# Supplementary material for: Performance Advantages of Left-Handed Cricket Batting Talent
Source: Front Psychol. 2020 Aug 6;11:1654. doi: 10.3389/fpsyg.2020.01654 (PMC7424046; doi:10.3389/fpsyg.2020.01654)
Supplement: Supplementary file 1 [file Data_Sheet_1.XLSX]

## Sheet: Frontiers Dataset 2F
Gender	BattingHand	number_matches	batting_innings	BattingAggregate	RunsPerGame	batting_notoutsPG	TwentyFive_PG	Fifty_PG	Hundred_PG	Ducks_PG	Fours_PG	Sixes_PG	Bat_MinsPG	BattingAverage	StrikeRate	BattingStance	AgeGroup
2	1	7	7	39	5.57	0	0	0	0	0.14	0.14	0	16.86	5.57	38.24	1	3
2	1	7	7	108	15.43	0.29	0.14	0	0	0	0.71	0	37.29	21.6	51.92	1	3
2	1	7	4	45	11.25	0.75	0.25	0	0	0	1.25	0	10	45	93.75	1	3
2	1	7	5	17	3.4	0.2	0	0	0	0.4	0	0	10.8	4.25	32.69	1	3
2	2	7	6	73	12.17	0	0.17	0	0	0.17	0.5	0	17.67	12.17	50.69	2	3
2	1	7	6	112	18.67	0	0.33	0	0	0	1.83	0	16.33	18.67	90.32	1	3
2	1	7	6	88	14.67	0.17	0.17	0	0	0	0.83	0	31	17.6	57.52	1	3
2	1	7	5	20	4	0.4	0	0	0	0.2	0	0	9	6.67	44.44	1	3
2	1	7	5	33	6.6	0.2	0	0	0	0.2	0.4	0	13.6	8.25	54.1	1	3
2	1	7	7	251	35.86	0.14	0.14	0.29	0	0	3.71	0.14	26.29	41.83	88.07	1	3
2	1	7	7	68	9.71	0	0.14	0	0	0.14	0.43	0	22	9.71	53.13	1	3
2	1	7	6	100	16.67	0.17	0	0.17	0	0	1.67	0	23.5	20	80.65	1	3
2	2	6	6	141	23.5	0.33	0.17	0.17	0	0.17	1.17	0	56.67	35.25	49.13	1	3
2	1	7	5	147	29.4	0	0.4	0.2	0	0	2.8	0	44.8	29.4	85.96	1	3
2	1	7	7	49	7	0	0.14	0	0	0.14	0.29	0	24.43	7	29.7	1	3
2	1	7	7	69	9.86	0.14	0.14	0	0	0	0.71	0	9	11.5	66.99	1	3
2	1	7	5	175	35	0	0.4	0.2	0	0	2.6	0	45.8	35	73.84	1	3
2	1	7	5	123	24.6	0	0.6	0	0	0	2.8	0	30.2	24.6	81.46	1	3
2	1	7	7	121	17.29	0	0.29	0	0	0.14	1.14	0	32.57	17.29	43.37	1	3
2	1	7	5	37	7.4	0.2	0	0	0	0	0.2	0	10.4	9.25	44.05	1	3
2	1	7	6	19	3.17	0	0	0	0	0.17	0.17	0	9.17	3.17	39.58	1	3
2	1	6	5	155	31	0.4	0.2	0	0.2	0.2	1	0	46.2	51.67	71.1	1	3
2	1	7	7	44	6.29	0	0	0	0	0.29	0.71	0	11.14	6.29	48.35	1	3
2	1	7	4	23	5.75	0.25	0	0	0	0	0.25	0	15	7.67	41.82	1	3
2	1	7	5	18	3.6	0.2	0	0	0	0.2	0.2	0	7.6	4.5	45	1	3
2	1	7	5	23	4.6	0.2	0	0	0	0	0	0	19	5.75	25.56	2	3
2	1	7	5	53	10.6	0.6	0	0	0	0	0.6	0	22.2	26.5	67.95	1	3
2	1	7	7	47	6.71	0.14	0	0	0	0	0.57	0	15.57	7.83	37.9	1	3
2	1	7	4	11	2.75	0.25	0	0	0	0	0	0	7.5	3.67	50	2	3
2	1	7	5	15	3	0	0	0	0	0.2	0	0	16	3	18.29	1	3
2	1	7	7	110	15.71	0	0	0	0	0	1.29	0	35.14	15.71	48.46	1	3
2	2	7	7	142	20.29	0	0.14	0.14	0	0	1.14	0	35.29	20.29	71	2	3
2	1	7	5	72	14.4	0.4	0	0	0	0	0.6	0.2	35.4	24	50.7	1	3
2	1	7	7	102	14.57	0.29	0	0.14	0	0	1.29	0	24.14	20.4	69.39	1	3
2	1	6	6	142	23.67	0.17	0.5	0	0	0	1.5	0	73.83	28.4	65.14	1	3
2	1	6	5	299	59.8	0.4	0	0.2	0.4	0	3.6	0.4	71.2	99.67	81.92	1	3
2	1	7	6	58	9.67	0.17	0.17	0	0	0.33	1	0	16.33	11.6	66.67	2	3
2	2	7	7	164	23.43	0.14	0.43	0	0	0	0.57	0	49.71	27.33	61.65	2	3
2	1	6	5	22	4.4	0	0	0	0	0.2	0	0	50.2	4.4	30.56	1	3
2	1	7	7	98	14	0	0.29	0	0	0.29	1.43	0.14	21.29	14	74.81	1	3
2	1	7	5	9	1.8	0.4	0	0	0	0.2	0.2	0	6	3	29.03	1	3
2	1	6	5	51	10.2	0.2	0	0	0	0	0.8	0	17	12.75	60	1	3
2	1	7	7	36	5.14	0.14	0	0	0	0.29	0.43	0	8.57	6	45.57	1	3
2	1	7	5	22	4.4	0.2	0	0	0	0.4	0.2	0	14.6	5.5	45.83	1	3
2	1	7	7	106	15.14	0	0.43	0	0	0	1.14	0	23	15.14	51.96	1	3
2	1	7	5	79	15.8	0	0.2	0	0	0	0.8	0	40.4	15.8	43.65	1	3
2	1	6	6	22	3.67	0	0	0	0	0.33	0.33	0	13	3.67	31.88	1	3
2	1	7	7	192	27.43	0.14	0.14	0.14	0	0.29	3	0.14	31.86	32	90.14	2	3
2	2	7	4	40	10	0	0	0	0	0.5	1.5	0	10.25	10	54.05	2	3
2	1	7	7	139	19.86	0	0.14	0.14	0	0.29	2.57	0.14	24.86	19.86	74.73	1	3
2	1	7	6	48	8	0	0	0	0	0	0.83	0	13.33	8	52.17	1	3
2	1	6	5	18	3.6	0	0	0	0	0.2	0.2	0	13.4	3.6	27.69	1	3
2	1	7	7	157	22.43	0.14	0.29	0.14	0	0	2.29	0	53	26.17	51.48	1	3
2	1	8	8	46	5.75	0	0.13	0	0	0.38	0.63	0	17.5	5.75	31.51	1	3
2	1	8	6	59	9.83	0	0	0	0	0	0.5	0	15.33	9.83	63.44	1	3
2	2	8	8	148	18.5	0.13	0.13	0.13	0	0.13	0.88	0	36.75	21.14	60.41	2	3
2	1	8	8	130	16.25	0	0.13	0.13	0	0.13	0.88	0	26.75	16.25	70.27	1	3
2	2	8	8	83	10.38	0	0.13	0	0	0.25	0.63	0	23.75	10.38	33.6	2	3
2	1	8	8	48	6	0.13	0	0	0	0.38	0.25	0	11.38	6.86	67.61	1	3
2	1	8	6	64	10.67	0.33	0.17	0	0	0.17	0.5	0	39	16	42.67	1	3
2	2	8	7	89	12.71	0	0.14	0	0	0	1.14	0	17.57	12.71	50	2	3
2	1	8	6	53	8.83	0.33	0.17	0	0	0.17	0.33	0	31.17	13.25	40.46	1	3
2	1	8	7	143	20.43	0.29	0.14	0.14	0	0	1.57	0	43.14	28.6	61.64	1	3
2	1	8	8	232	29	0	0.25	0.25	0	0	2.38	0	54	29	62.2	1	3
2	1	8	8	32	4	0	0	0	0	0.25	0	0	13.25	4	36.36	1	3
2	1	8	8	47	5.88	0	0	0	0	0.13	0.13	0	24.25	5.88	30.13	1	3
2	1	8	7	10	1.43	0	0	0	0	0.57	0	0	8.14	1.43	16.39	1	3
2	1	8	8	161	20.13	0.13	0.38	0	0	0	2.75	0	28.25	23	87.03	1	3
2	1	8	6	28	4.67	0.33	0	0	0	0	0.17	0	14.67	7	46.67	1	3
2	1	8	7	58	8.29	0.43	0	0	0	0.29	0.29	0.14	22	14.5	45.67	1	3
2	1	8	6	48	8	0.33	0	0	0	0.17	0.17	0	26.17	12	39.02	1	3
2	1	8	6	30	5	0	0	0	0	0.33	0.5	0	10.5	5	29.7	1	3
2	1	8	4	10	2.5	0.25	0	0	0	0.25	0.25	0	5.25	3.33	43.48	1	3
2	1	8	8	212	26.5	0	0.13	0.25	0	0.13	2.38	0.38	28.63	26.5	104.43	1	3
2	1	8	4	15	3.75	0	0	0	0	0.25	0	0	14.5	3.75	31.91	1	3
2	1	8	8	149	18.63	0	0.13	0.13	0	0.13	0.5	0	39.63	18.63	56.23	1	3
2	1	8	7	54	7.71	0	0	0	0	0.29	0.57	0.14	16.29	7.71	50	1	3
2	1	8	8	177	22.13	0.25	0.5	0	0	0	2.13	0	32.25	29.5	95.68	1	3
2	2	8	6	26	4.33	0.17	0	0	0	0.17	0.33	0	12.17	5.2	31.71	2	3
2	1	8	5	33	6.6	0	0	0	0	0.2	0.2	0	18.2	6.6	28.95	1	3
2	1	8	8	83	10.38	0.25	0	0.13	0	0	0.63	0.13	17.13	13.83	51.55	1	3
2	1	8	8	129	16.13	0.13	0.13	0.13	0	0.25	1.5	0	32.88	18.43	62.62	1	3
2	1	8	8	139	17.38	0.25	0.25	0	0	0	0.75	0	51.38	23.17	40.76	1	3
2	1	8	4	25	6.25	0.25	0	0	0	0	0.25	0	22.5	8.33	46.3	1	3
2	1	8	8	57	7.13	0	0	0	0	0	0	0	30.75	7.13	26.76	1	3
2	1	8	6	50	8.33	0.17	0.17	0	0	0.17	0.83	0	28.83	10	27.93	1	3
2	1	8	5	17	3.4	0	0	0	0	0.2	0.2	0	5.8	3.4	62.96	2	3
2	1	8	4	8	2	0	0	0	0	0	0	0	12	2	21.05	1	3
2	1	8	6	45	7.5	0.17	0	0	0	0	0	0	24.5	9	35.16	1	3
2	1	8	7	24	3.43	0.43	0	0	0	0.29	0	0	12.57	6	27.27	1	3
2	1	8	8	35	4.38	0.13	0	0	0	0.38	0.25	0	14.63	5	40.23	2	3
2	1	8	8	169	21.13	0	0.13	0.13	0	0.13	1.38	0	45.75	21.13	64.5	1	3
2	2	8	8	155	19.38	0.25	0.25	0	0	0	1.63	0	46.63	25.83	43.06	1	3
2	2	8	8	118	14.75	0.13	0	0.13	0	0.25	0.88	0	34.88	16.86	58.71	2	3
2	2	8	4	28	7	0.25	0	0	0	0	0.25	0	29	9.33	33.73	2	3
2	1	8	8	32	4	0	0	0	0	0.25	0	0	14.25	4	27.59	1	3
2	1	8	5	33	6.6	0	0	0	0	0	0.4	0	8.6	6.6	64.71	1	3
2	1	8	7	61	8.71	0.14	0.14	0	0	0	0.14	0	23.14	10.17	48.03	1	3
2	1	8	8	128	16	0	0.13	0	0	0	1	0	32	16	46.89	1	3
2	1	8	4	28	7	0.25	0	0	0	0.25	0.25	0	13.25	9.33	164.71	2	3
2	2	8	8	90	11.25	0.13	0.25	0	0	0.25	0.63	0	34.75	12.86	56.96	2	3
2	1	8	8	57	7.13	0	0	0	0	0.13	1	0	24.13	7.13	30	1	3
2	1	8	6	26	4.33	0.17	0	0	0	0	0.17	0	19.67	5.2	29.89	1	3
2	1	8	8	63	7.88	0.5	0	0	0	0	0.38	0	29	15.75	45.65	2	3
2	1	8	5	9	1.8	0.2	0	0	0	0.2	0	0	7.2	2.25	40.91	1	3
2	1	8	8	99	12.38	0	0.25	0	0	0.38	1.38	0	21.13	12.38	50.77	1	3
2	1	8	7	45	6.43	0.43	0	0	0	0.29	0.57	0	12.86	11.25	50.56	1	3
2	1	8	7	86	12.29	0.14	0.29	0	0	0	1	0	30.86	14.33	56.21	1	3
2	1	8	8	63	7.88	0	0.13	0	0	0.13	0.38	0	21.75	7.88	45.65	1	3
2	1	8	6	122	20.33	0.17	0.17	0.17	0	0	1.67	0	42.67	24.4	50.21	1	3
2	1	8	5	49	9.8	0	0.2	0	0	0.2	0.8	0	21.4	9.8	61.25	1	3
2	1	8	6	20	3.33	0.5	0	0	0	0.17	0	0	20.33	6.67	22.99	1	3
2	1	8	8	157	19.63	0.25	0.38	0	0	0	1.75	0	30.63	26.17	88.2	1	3
2	1	7	6	42	7	0.5	0	0	0	0	0.33	0	26.17	14	36.84	1	3
2	2	7	7	98	14	0.14	0.14	0	0	0.14	0.57	0	19.57	16.33	41.35	2	3
2	1	7	7	36	5.14	0	0	0	0	0.29	0.71	0	13.29	5.14	64.29	1	3
2	1	7	7	82	11.71	0.14	0.14	0	0	0	0.43	0	41.29	13.67	49.7	1	3
2	2	7	5	40	8	0.2	0	0	0	0	0.4	0	50.2	10	47.06	1	3
2	1	7	5	15	3	0.2	0	0	0	0.2	0.2	0	11	3.75	37.5	1	3
2	1	6	4	13	3.25	0.25	0	0	0	0	0	0	16	4.33	22.03	1	3
2	1	6	6	122	20.33	0.17	0.17	0.17	0	0	1.83	0	45.17	24.4	63.21	1	3
2	1	7	4	12	3	0	0	0	0	0	0.25	0	23	3	21.82	1	3
2	1	8	8	69	8.63	0	0	0	0	0.25	0.88	0	21.63	8.63	56.1	1	3
2	1	8	8	106	13.25	0	0	0.13	0	0.38	0.63	0	25.75	13.25	72.11	1	3
2	1	6	5	43	8.6	0.2	0.2	0	0	0.2	0.2	0	28.4	10.75	47.78	1	3
2	1	7	5	76	15.2	0.2	0.2	0	0	0	0.8	0.2	80	19	46.91	1	3
2	1	7	6	25	4.17	0	0	0	0	0.33	0.33	0	15.17	4.17	48.08	1	3
2	1	7	6	91	15.17	0.17	0	0.17	0	0.33	0.5	0	44.83	18.2	39.57	1	3
2	1	7	7	199	28.43	0	0.14	0.29	0	0	2.14	0.29	49.57	28.43	92.99	1	3
2	2	7	7	134	19.14	0.43	0.43	0	0	0	1	0	62.29	33.5	60.36	2	3
2	1	6	6	126	21	0.33	0.5	0	0	0	0.83	0	51	31.5	47.37	1	3
2	1	6	4	15	3.75	0	0	0	0	0	0	0	18.25	3.75	19.74	1	3
2	2	7	7	66	9.43	0	0.14	0	0	0.14	0.71	0	19.86	9.43	53.66	2	3
2	1	6	5	30	6	0.4	0	0	0	0.2	0	0	21.8	10	35.29	1	3
2	1	8	8	151	18.88	0	0.38	0	0	0	0.63	0.13	43.13	18.88	63.18	1	3
2	1	7	7	110	15.71	0	0	0	0	0	0.86	0	44.86	15.71	53.66	1	3
2	2	7	4	12	3	0.25	0	0	0	0.25	0.25	0	19.25	4	40	2	3
2	1	7	6	109	18.17	0.17	0.33	0	0	0.17	0.33	0	21.5	21.8	60.56	1	3
2	1	8	7	94	13.43	0	0	0.14	0	0.14	0.29	0	30.43	13.43	44.55	1	3
2	1	7	7	59	8.43	0.14	0.14	0	0	0.14	0.14	0	53.43	9.83	31.22	1	3
2	1	7	7	81	11.57	0.29	0.14	0	0	0.14	0.86	0	26.57	16.2	66.39	1	3
2	1	8	8	128	16	0	0	0.13	0	0.13	0.75	0	61	16	46.04	1	3
2	1	7	6	102	17	0.17	0.33	0	0	0.17	1	0	43.17	20.4	52.58	1	3
2	1	7	6	41	6.83	0.33	0	0	0	0	0.17	0	23.33	10.25	37.96	1	3
2	1	8	8	58	7.25	0.25	0.13	0	0	0.38	0.38	0	21.75	9.67	42.96	1	3
2	1	7	7	33	4.71	0	0	0	0	0.29	0.29	0	9.57	4.71	36.67	1	3
2	1	6	5	51	10.2	0.4	0.2	0	0	0.2	0.4	0	26.2	17	42.5	1	3
2	1	6	5	51	10.2	0	0.2	0	0	0.2	0.8	0	22	10.2	47.66	2	3
2	2	7	6	90	15	0.17	0	0	0	0	1	0	31.33	18	39.65	1	3
2	1	7	4	5	1.25	0.25	0	0	0	0.5	0	0	6.75	1.67	16.67	1	3
2	1	7	4	27	6.75	0	0	0	0	0.25	0.5	0	16.25	6.75	45.76	1	3
2	1	6	4	56	14	0.25	0	0	0	0	0.25	0.25	30.25	18.67	54.9	1	3
2	1	7	6	22	3.67	0.17	0	0	0	0.17	0.17	0	32.33	4.4	31.43	1	3
2	1	8	7	43	6.14	0.43	0.14	0	0	0.29	0.43	0	23	10.75	39.81	1	3
2	1	8	5	22	4.4	0.2	0	0	0	0.2	0	0	18.8	5.5	31.88	1	3
2	1	8	7	55	7.86	0.29	0	0	0	0	0.43	0	36.86	11	36.67	1	3
2	1	6	6	43	7.17	0	0	0	0	0	0.33	0	19	7.17	61.43	1	3
2	1	8	6	43	7.17	0.33	0	0	0	0.17	0.17	0	36.83	10.75	31.39	1	3
2	1	7	5	22	4.4	0.2	0	0	0	0.2	0.2	0	65.4	5.5	23.16	1	3
2	1	7	6	52	8.67	0.33	0	0	0	0	0.5	0	58.5	13	35.37	1	3
2	1	8	8	114	14.25	0.13	0.25	0	0	0.13	1	0	23.38	16.29	87.02	1	3
2	1	7	4	23	5.75	0.5	0	0	0	0.25	0.5	0	23.25	11.5	33.82	1	3
2	2	8	8	72	9	0.38	0.13	0	0	0.13	0.75	0	20.88	14.4	52.94	2	3
2	1	7	6	36	6	0.33	0	0	0	0	0.33	0	19.33	9	53.73	1	3
2	1	7	5	61	12.2	0.4	0.2	0	0	0	0	0	58.2	20.33	30.96	1	3
2	1	7	5	61	12.2	0	0.2	0	0	0.2	1.4	0	22.4	12.2	52.14	1	3
2	1	7	7	90	12.86	0	0.29	0	0	0	1	0	30.29	12.86	45	1	3
2	1	8	7	53	7.57	0	0	0	0	0.14	0.43	0	15.57	7.57	47.75	1	3
2	1	8	5	43	8.6	0.2	0.2	0	0	0.2	0.4	0	25	10.75	34.4	1	3
2	1	8	6	46	7.67	0.17	0.17	0	0	0.33	0.5	0.17	14.33	9.2	56.79	1	3
2	2	8	8	205	25.63	0.13	0.63	0	0	0	2.75	0	99	29.29	56.16	2	3
2	1	8	4	37	9.25	0	0	0	0	0.25	1.5	0	14.25	9.25	31.09	1	3
2	1	8	5	25	5	0.4	0	0	0	0	0.6	0	15	8.33	58.14	1	3
2	1	8	5	17	3.4	0.4	0	0	0	0.2	0.2	0	16.2	5.67	27.42	1	3
2	1	8	7	26	3.71	0	0	0	0	0.29	0.43	0	9	3.71	54.17	1	3
2	1	8	4	5	1.25	0.5	0	0	0	0.25	0	0	11.5	2.5	13.51	1	3
2	1	8	6	43	7.17	0	0	0	0	0.33	0.17	0	17.5	7.17	64.18	1	3
2	1	8	8	133	16.63	0	0.13	0	0	0	2.5	0	24.5	16.63	56.84	1	3
2	1	8	6	93	15.5	0.17	0.33	0	0	0.17	1.17	0	50.67	18.6	51.38	1	3
2	1	8	4	19	4.75	0.25	0	0	0	0.25	0	0	15	6.33	37.25	1	3
2	1	8	5	24	4.8	0.2	0	0	0	0	0.6	0	5.2	6	114.29	1	3
2	1	8	4	21	5.25	0	0	0	0	0.25	0.25	0	28	5.25	25	1	3
2	1	8	7	105	15	0	0.14	0	0	0	1.29	0	21.57	15	58.01	1	3
2	1	8	7	84	12	0	0.14	0	0	0.14	1.71	0	26.29	12	60.87	1	3
2	1	8	7	39	5.57	0	0	0	0	0.29	0.43	0	13.57	5.57	36.79	1	3
2	1	8	8	103	12.88	0.25	0.13	0	0	0	1.13	0	81.75	17.17	50.49	1	3
2	1	8	4	2	0.5	0.5	0	0	0	0.25	0	0	4.25	1	50	1	3
2	1	8	5	23	4.6	0.4	0	0	0	0.4	0.4	0	17.4	7.67	41.82	1	3
2	2	8	8	86	10.75	0.13	0	0	0	0	0.88	0	60.25	12.29	39.45	2	3
2	1	8	8	183	22.88	0.13	0.13	0.13	0	0	3	0.25	35.88	26.14	84.33	1	3
2	1	8	4	24	6	0.5	0	0	0	0	0.5	0	11.5	12	48.98	1	3
2	2	8	8	123	15.38	0.25	0.25	0	0	0.13	1.5	0.13	48.38	20.5	65.78	2	3
2	1	8	7	109	15.57	0.29	0	0.14	0	0.14	1.57	0	37.43	21.8	61.24	1	3
2	1	8	6	65	10.83	0.17	0.17	0	0	0.17	1.17	0	18.17	13	69.89	2	3
2	1	8	6	28	4.67	0.17	0	0	0	0.5	0.67	0	6.83	5.6	41.79	1	3
2	1	8	6	112	18.67	0.5	0	0.17	0	0.17	2.33	0.33	28.33	37.33	110.89	1	3
2	1	8	4	11	2.75	0.25	0	0	0	0.25	0	0	8	3.67	37.93	1	3
2	1	8	7	93	13.29	0.29	0.29	0	0	0	0.71	0	43.14	18.6	45.15	1	3
2	1	8	6	28	4.67	0	0	0	0	0.33	0.17	0	12.83	4.67	32.56	1	3
2	1	8	7	153	21.86	0	0.14	0.14	0	0.14	1.71	0	38.57	21.86	65.38	1	3
2	1	8	6	53	8.83	0.17	0.17	0	0	0.17	0.5	0	28	10.6	40.46	1	3
2	1	8	7	67	9.57	0	0	0	0	0	0.43	0	29.43	9.57	33.67	1	3
2	1	8	8	118	14.75	0.25	0.25	0	0	0	1.63	0	20.38	19.67	81.94	2	3
2	1	8	8	64	8	0.25	0	0	0	0	0.63	0	22.75	10.67	36.57	1	3
2	1	8	5	17	3.4	0	0	0	0	0	0.2	0	13.4	3.4	26.98	2	3
2	1	8	4	15	3.75	0.25	0	0	0	0	0	0	14.75	5	31.91	1	3
2	2	8	8	375	46.88	0.25	0.38	0.38	0	0	5.25	0	125.13	62.5	88.03	1	3
2	1	8	7	52	7.43	0.29	0.14	0	0	0.29	0.57	0	14.43	10.4	40	1	3
2	1	8	8	50	6.25	0.13	0.13	0	0	0.13	0.63	0	13	7.14	44.25	1	3
2	1	8	8	41	5.13	0.13	0	0	0	0.25	0.38	0	12.5	5.86	41.84	1	3
2	1	8	6	74	12.33	0.17	0.17	0	0	0	1.17	0	28.17	14.8	66.07	1	3
2	1	8	5	24	4.8	0.4	0	0	0	0.4	0.8	0	9.6	8	48.98	2	3
2	1	6	5	101	20.2	0.2	0.2	0.2	0	0	0.2	0	51.4	25.25	51.27	1	3
2	1	8	8	170	21.25	0.25	0.13	0.25	0	0	1.38	0	41.75	28.33	57.05	1	3
2	2	8	4	12	3	0.25	0	0	0	0.5	0	0	9.25	4	34.29	2	3
2	1	8	5	38	7.6	0.2	0.2	0	0	0.4	0.6	0	15.6	9.5	58.46	1	3
2	1	8	8	96	12	0.13	0.13	0	0	0.13	0.75	0	29.63	13.71	42.11	1	3
2	1	8	8	83	10.38	0.13	0	0	0	0.13	0.88	0	25.38	11.86	40.69	1	3
2	1	8	8	183	22.88	0.13	0.63	0	0	0	2.63	0	35.75	26.14	84.33	1	3
2	1	8	4	14	3.5	0.25	0	0	0	0	0.5	0	10.75	4.67	46.67	1	3
2	2	8	7	115	16.43	0	0.14	0.14	0	0.14	0.43	0	36.14	16.43	55.02	2	3
2	2	8	6	55	9.17	0	0.17	0	0	0.5	0.33	0	12.67	9.17	41.67	2	3
2	1	8	4	45	11.25	0.25	0	0	0	0.25	0.25	0	22.25	15	36.59	1	3
2	1	8	7	171	24.43	0.29	0.43	0.14	0	0	1.86	0	50.86	34.2	77.38	1	3
2	1	8	7	87	12.43	0.14	0.14	0	0	0	0.86	0	28	14.5	57.62	1	3
2	1	8	8	75	9.38	0	0	0	0	0.25	0.75	0	43.25	9.38	44.91	1	3
2	1	8	7	32	4.57	0.14	0	0	0	0.14	0	0	22.14	5.33	24.06	1	3
2	1	8	8	47	5.88	0.13	0	0	0	0.25	0.38	0	18	6.71	36.72	1	3
2	1	8	7	60	8.57	0.29	0	0	0	0	0.29	0	48.29	12	45.45	1	3
2	1	8	6	36	6	0.17	0	0	0	0.17	0.33	0	15.5	7.2	38.71	1	3
2	1	8	8	36	4.5	0	0.13	0	0	0.63	0.25	0	16	4.5	33.03	1	3
2	1	8	7	176	25.14	0.43	0.29	0.14	0	0	1.29	0	56.57	44	59.66	1	3
2	1	8	7	43	6.14	0.29	0	0	0	0.43	0.43	0	11.71	8.6	53.09	1	3
2	1	8	7	27	3.86	0	0	0	0	0.29	0.43	0	4.29	3.86	42.19	1	3
2	1	7	4	31	7.75	0	0	0	0	0	1.25	0	10.25	7.75	79.49	1	4
2	2	7	7	240	34.29	0.43	0.14	0.29	0	0	4.71	0	61.71	60	71.86	2	4
2	1	7	6	33	5.5	0.33	0	0	0	0.17	0.67	0	9.67	8.25	51.56	1	4
2	2	7	5	131	26.2	0	0.4	0	0	0	2.8	0	28.8	26.2	110.08	1	4
2	1	7	5	27	5.4	0.2	0	0	0	0.2	1	0	11.8	6.75	64.29	1	4
2	1	7	8	179	22.38	0.13	0.38	0	0	0	3.38	0.38	23.75	25.57	97.28	1	4
2	1	7	6	31	5.17	0.33	0	0	0	0.17	0.33	0	12.83	7.75	47.69	1	4
2	1	7	4	26	6.5	0	0	0	0	0	0.5	0	16.75	6.5	49.06	1	4
2	1	7	5	121	24.2	0.2	0.6	0	0	0	3.6	0	31.4	30.25	92.37	1	4
2	1	7	7	313	44.71	0.43	0	0.29	0.14	0	5.14	0.43	49.86	78.25	92.33	1	4
2	1	7	8	44	5.5	0.25	0	0	0	0.25	0.25	0	17.5	7.33	32.12	1	4
2	1	7	7	78	11.14	0.14	0.14	0	0	0	0.57	0	25.29	13	56.52	1	4
2	2	7	6	74	12.33	0.17	0	0	0	0.17	1.5	0	27	14.8	66.07	2	4
2	1	7	8	87	10.88	0.13	0.13	0	0	0.13	1.25	0	21.88	12.43	50	1	4
2	1	7	7	54	7.71	0.14	0	0	0	0.14	1.14	0	24.86	9	45.38	1	4
2	1	7	7	172	24.57	0.29	0.14	0.14	0	0	2.29	0.86	29.86	34.4	113.16	1	4
2	2	7	7	154	22	0.43	0.14	0.14	0	0	1.43	0	43	38.5	68.14	2	4
2	1	7	7	121	17.29	0.29	0	0.14	0	0	2.71	0	30.71	24.2	81.76	1	4
2	1	7	6	41	6.83	0.33	0	0	0	0	1	0	11.5	10.25	66.13	1	4
2	2	7	6	53	8.83	0.33	0.17	0	0	0.17	1	0	13.33	13.25	80.3	2	4
2	1	7	5	30	6	0.6	0	0	0	0.2	0.6	0	12.6	15	50.85	1	4
2	1	7	6	43	7.17	0.17	0.17	0	0	0.33	0.17	0	15.33	8.6	56.58	1	4
2	1	7	7	158	22.57	0.14	0.43	0	0	0.14	2.43	0.14	36.86	26.33	82.29	1	4
2	1	7	6	7	1.17	0	0	0	0	0.67	0.17	0	11.5	1.17	12.96	1	4
2	1	7	6	77	12.83	0.17	0.17	0	0	0.17	1.17	0	26.5	15.4	61.6	2	4
2	1	7	7	32	4.57	0.14	0	0	0	0.29	0.29	0	14.14	5.33	43.84	1	4
2	1	7	6	31	5.17	0.33	0.17	0	0	0.5	0.5	0	13.33	7.75	38.27	1	4
2	1	7	6	75	12.5	0.33	0.17	0	0	0	0.67	0	28.5	18.75	47.17	2	4
2	1	7	5	35	7	0.2	0	0	0	0	0.2	0	30	8.75	30.7	1	4
2	2	7	7	141	20.14	0	0	0.14	0	0.14	3.14	0.14	25.86	20.14	88.68	1	4
2	1	7	5	14	2.8	0.6	0	0	0	0	0.4	0	8.2	7	53.85	1	4
2	1	7	7	62	8.86	0.14	0.14	0	0	0	1.29	0	23.14	10.33	47.69	1	4
2	1	7	7	68	9.71	0	0.14	0	0	0.29	1.29	0	19.29	9.71	58.12	1	4
2	1	7	8	60	7.5	0	0	0.13	0	0.38	0.63	0	21.25	7.5	34.68	1	4
2	1	7	4	27	6.75	0.5	0	0	0	0.25	0.75	0	14.5	13.5	55.1	1	4
2	1	7	4	33	8.25	0.25	0	0	0	0.5	0.5	0	12.5	11	76.74	1	4
2	1	7	4	0	0	0.25	0	0	0	0.75	0	0	3.75	0	0	1	4
2	1	7	8	160	20	0	0.25	0	0	0.13	2.63	0.25	30.38	20	82.47	1	4
2	1	7	6	107	17.83	0	0.33	0	0	0.17	1.67	0	34.67	17.83	56.02	1	4
2	1	7	4	20	5	0.25	0	0	0	0.25	0.25	0	10.75	6.67	45.45	1	4
2	1	7	7	162	23.14	0	0.14	0.14	0	0.14	3.14	1	35.71	23.14	89.01	1	4
2	1	7	6	107	17.83	0.17	0.33	0	0	0	2.5	0	28	21.4	82.31	1	4
2	1	7	7	12	1.71	0.14	0	0	0	0.71	0.14	0	6.57	2	27.27	1	4
2	1	7	9	49	5.44	0	0	0	0	0.33	0.67	0	21.78	5.44	33.11	1	4
2	1	7	7	101	14.43	0.14	0.29	0	0	0.14	1.14	0	42	16.83	43.35	1	4
2	2	7	8	89	11.13	0.13	0	0	0	0	0.75	0	32.63	12.71	41.59	2	4
2	1	7	6	7	1.17	0.33	0	0	0	0.17	0	0	10.33	1.75	14.29	1	4
2	1	7	4	10	2.5	0	0	0	0	0.5	0.5	0	8.75	2.5	27.78	1	4
2	1	7	6	23	3.83	0.33	0	0	0	0	0	0	8.67	5.75	41.82	1	4
2	1	7	4	4	1	0.25	0	0	0	0.25	0	0	7.75	1.33	16.67	1	4
2	1	7	7	158	22.57	0.29	0.43	0	0	0.29	3.14	0	39	31.6	63.97	1	4
2	1	7	4	28	7	0	0	0	0	0.25	0.25	0	16	7	36.36	1	4
2	1	7	4	28	7	0	0	0	0	0	1	0	8	7	68.29	1	4
2	1	7	8	140	17.5	0.13	0.38	0	0	0.13	3	0	27.13	20	74.87	1	4
2	1	7	4	30	7.5	0.25	0	0	0	0.25	0.5	0	41.5	10	24	1	4
2	1	7	5	29	5.8	0.4	0	0	0	0.2	0.4	0	13	9.67	64.44	1	4
2	1	7	6	34	5.67	0.33	0	0	0	0.33	0.67	0	14.67	8.5	37.78	1	4
2	1	7	5	2	0.4	0.2	0	0	0	0.4	0	0	3.6	0.5	14.29	1	4
2	2	7	5	62	12.4	0.4	0.2	0	0	0.2	1.2	0	26.4	20.67	60.78	2	4
2	1	7	6	91	15.17	0.17	0.17	0	0	0	2	0	27.33	18.2	72.22	1	4
2	1	7	5	165	33	0.2	0.4	0.2	0	0	4.6	0	63.2	41.25	62.03	1	4
2	1	7	5	9	1.8	0.2	0	0	0	0.4	0.2	0	6.4	2.25	29.03	1	4
2	1	7	7	125	17.86	0	0.29	0	0	0.14	1.29	0	39.14	17.86	52.52	1	4
2	1	7	5	51	10.2	0.4	0	0	0	0	1.8	0	18	17	71.83	1	4
2	1	7	6	120	20	0.5	0.33	0	0	0	0.5	0	33.5	40	63.16	1	4
2	1	7	6	33	5.5	0.5	0	0	0	0	0.5	0	19	11	28.7	1	4
2	2	7	7	121	17.29	0.14	0.29	0	0	0.14	2.57	0	22.86	20.17	88.32	1	4
2	1	7	4	4	1	0.25	0	0	0	0.25	0	0	6	1.33	15.38	1	4
2	1	7	5	18	3.6	0	0	0	0	0.2	0.6	0	5.4	3.6	39.13	1	4
2	1	7	7	18	2.57	0	0	0	0	0.43	0	0	7.43	2.57	18.95	1	4
2	1	7	7	115	16.43	0	0.14	0	0	0	1.14	0	32	16.43	62.84	1	4
2	1	7	6	125	20.83	0.17	0.33	0	0	0	2.83	0	31.5	25	69.06	1	4
2	1	7	6	98	16.33	0	0.33	0	0	0	1.5	0	25	16.33	74.24	1	4
2	1	7	7	137	19.57	0	0.29	0	0	0	2.43	0	26.57	19.57	80.59	1	4
2	1	7	9	62	6.89	0.11	0	0	0	0.11	0.56	0	12.78	7.75	82.67	1	4
2	1	7	7	40	5.71	0.14	0	0	0	0.29	0.57	0	11	6.67	53.33	1	4
2	1	7	4	26	6.5	0.5	0	0	0	0	0.5	0	6.75	13	70.27	1	4
2	2	7	7	67	9.57	0.29	0.14	0	0	0.14	1.29	0	18.57	13.4	62.62	2	4
2	1	7	4	77	19.25	0	0.5	0	0	0	2.25	0	37	19.25	61.11	2	4
2	2	7	7	84	12	0.14	0.14	0	0	0	1.14	0	11	14	57.93	2	4
2	1	7	5	8	1.6	0	0	0	0	0.2	0	0	11.4	1.6	21.05	1	4
2	1	7	4	54	13.5	0.75	0.25	0	0	0.25	1.75	0	22.25	54	61.36	1	4
2	1	7	7	53	7.57	0.43	0	0	0	0.29	1	0	17.43	13.25	60.92	1	4
2	2	7	5	64	12.8	0	0.2	0	0	0.2	1.4	0	26.6	12.8	53.78	2	4
2	1	7	7	71	10.14	0.14	0	0	0	0	1.14	0	18.86	11.83	43.29	1	4
2	1	7	7	48	6.86	0	0.14	0	0	0.14	0.43	0	5.71	6.86	47.52	1	4
2	1	7	5	25	5	0.2	0	0	0	0.6	0.4	0	17	6.25	37.31	1	4
2	1	7	5	43	8.6	0.2	0.2	0	0	0.2	1.4	0	19	10.75	46.24	1	4
2	1	7	7	136	19.43	0	0.14	0.14	0	0	3	0	25	19.43	94.44	1	4
2	2	7	7	62	8.86	0.14	0	0	0	0.14	0.57	0	18.86	10.33	64.58	2	4
2	1	7	4	13	3.25	0.25	0	0	0	0.25	0.25	0	2.75	4.33	21.31	1	4
2	1	7	5	35	7	0.4	0	0	0	0.2	1	0	11.4	11.67	71.43	1	4
2	1	7	5	80	16	0	0.2	0	0	0	1.6	0	31.2	16	56.74	1	4
2	1	7	8	79	9.88	0	0.25	0	0	0.13	1.75	0	11.38	9.88	73.15	1	4
2	1	7	7	113	16.14	0.14	0.14	0	0	0.14	2.14	0.29	21.29	18.83	78.47	1	4
2	1	7	8	76	9.5	0.13	0.13	0	0	0.13	1.13	0	17.38	10.86	67.86	1	4
2	1	7	7	214	30.57	0.43	0.43	0.14	0	0.14	4.57	0	41.14	53.5	92.24	1	4
2	1	7	7	37	5.29	0.14	0	0	0	0.14	0.57	0	7.57	6.17	33.94	1	4
2	1	7	4	11	2.75	0	0	0	0	0.25	0.25	0	7.5	2.75	34.38	1	4
2	1	7	7	67	9.57	0.43	0	0	0	0	0.57	0	19.57	16.75	54.92	1	4
2	1	7	7	170	24.29	0	0.14	0.14	0	0.14	3	0	41.29	24.29	68.83	2	4
2	1	7	6	44	7.33	0.17	0	0	0	0	0.33	0	13.17	8.8	46.32	1	4
2	1	7	6	64	10.67	0.17	0	0	0	0	1.17	0	16.5	12.8	47.41	1	4
2	1	7	5	16	3.2	0.2	0	0	0	0.2	0.2	0	12	4	19.05	1	4
2	1	7	8	124	15.5	0.13	0.25	0.13	0	0.13	1.88	0.13	17.38	17.71	93.94	1	4
2	1	7	5	13	2.6	0.4	0	0	0	0.2	0.2	0	9	4.33	11.21	1	4
2	1	7	7	130	18.57	0.14	0.14	0.14	0	0	2.29	0.14	25	21.67	97.01	1	4
2	1	7	8	155	19.38	0.13	0	0.13	0	0.13	2.38	0.25	25.25	22.14	82.89	1	4
2	1	7	8	82	10.25	0.13	0	0	0	0	1.38	0	19	11.71	68.33	1	4
2	1	7	5	33	6.6	0.4	0	0	0	0.2	1	0	16	11	44	1	4
2	1	7	6	91	15.17	0.5	0	0.17	0	0.17	1.17	0.33	18.83	30.33	86.67	1	4
2	2	7	4	38	9.5	0.25	0.25	0	0	0.5	1	0	16.25	12.67	71.7	2	4
2	2	7	8	60	7.5	0	0	0	0	0.13	0.75	0	13.88	7.5	50	2	4
2	1	7	7	125	17.86	0.14	0.43	0	0	0.14	1.14	0	34.43	20.83	66.49	1	4
2	1	7	5	111	22.2	0.2	0.4	0	0	0	3	0	32.6	27.75	73.51	1	4
2	1	7	6	111	18.5	0.17	0.33	0	0	0.17	2.5	0	21.83	22.2	60.99	1	4
2	1	7	8	159	19.88	0.38	0.13	0.25	0	0.25	2.25	0.13	16.63	31.8	79.5	1	4
2	1	7	5	74	14.8	0	0	0.2	0	0.4	1.4	0	20.2	14.8	71.84	1	4
2	1	7	6	106	17.67	0.33	0	0.17	0	0	2.5	0	22.33	26.5	95.5	1	4
2	1	7	5	89	17.8	0.2	0.2	0	0	0.2	2.6	0	24.4	22.25	88.12	1	4
2	1	8	9	81	9	0.22	0.11	0	0	0.11	0.44	0	22.78	11.57	48.21	1	4
2	1	8	4	97	24.25	0	0.5	0	0	0	3.25	0	50	24.25	53.01	1	4
2	1	8	8	140	17.5	0.25	0.25	0.13	0	0	1.5	0	33.75	23.33	55.78	1	4
2	1	8	8	112	14	0.25	0.25	0	0	0.25	1.63	0	24.88	18.67	75.17	1	4
2	1	8	4	13	3.25	0	0	0	0	0.25	0.25	0	10.75	3.25	46.43	1	4
2	1	8	6	43	7.17	0.33	0	0	0	0.17	0.67	0	28.5	10.75	29.25	1	4
2	1	8	8	90	11.25	0.13	0.13	0	0	0.13	1.13	0	32.63	12.86	40.54	1	4
2	1	8	5	23	4.6	0	0	0	0	0.2	0.4	0	14.6	4.6	32.39	1	4
2	1	8	5	27	5.4	0	0	0	0	0	0.6	0	11.6	5.4	60	1	4
2	1	8	6	155	25.83	0.5	0.33	0.17	0	0	2.67	0	38.33	51.67	76.35	1	4
2	1	8	6	98	16.33	0.17	0.17	0	0	0	1	0	40	19.6	50.78	1	4
2	1	8	6	111	18.5	0	0.5	0	0	0.33	1.83	0	25.5	18.5	73.51	1	4
2	1	8	6	168	28	0.33	0.17	0	0.17	0	3.33	0	46.5	42	72.41	1	4
2	1	8	9	268	29.78	0.44	0.33	0.22	0	0	3.33	0	47.67	53.6	76.79	1	4
2	1	8	8	23	2.88	0.13	0	0	0	0.38	0.13	0	9	3.29	42.59	1	4
2	1	8	7	111	15.86	0.29	0.14	0	0	0	1.43	0	21.57	22.2	79.86	1	4
2	1	8	7	66	9.43	0.57	0	0	0	0	0.86	0	20.86	22	54.55	1	4
2	1	8	8	138	17.25	0.13	0.25	0	0	0	2.38	0	25.38	19.71	83.64	1	4
2	2	8	4	21	5.25	0	0	0	0	0.5	0.5	0	16	5.25	33.33	1	4
2	1	8	4	8	2	0.75	0	0	0	0	0	0	8	8	23.53	1	4
2	1	8	5	20	4	0.2	0	0	0	0.2	0	0	18.6	5	19.05	1	4
2	1	8	8	96	12	0	0.25	0	0	0	1.25	0	28.13	12	54.55	2	4
2	1	8	4	11	2.75	0.5	0	0	0	0	0.25	0	9.25	5.5	40.74	1	4
2	1	8	7	181	25.86	0.14	0.14	0.14	0	0.14	2.14	0	33.86	30.17	85.38	1	4
2	1	8	8	43	5.38	0	0	0	0	0.25	0.38	0	18.63	5.38	29.86	1	4
2	1	8	8	90	11.25	0.38	0.13	0	0	0	1.25	0	17.25	18	71.43	2	4
2	1	8	8	77	9.63	0	0	0	0	0	1.13	0	17.75	9.63	57.04	1	4
2	1	8	6	68	11.33	0	0.17	0	0	0	1	0	31.83	11.33	37.16	1	4
2	1	8	7	43	6.14	0.14	0	0	0	0.29	0.43	0	12.43	7.17	59.72	1	4
2	1	8	6	34	5.67	0.17	0	0	0	0	0.5	0	10.5	6.8	72.34	1	4
2	1	8	5	54	10.8	0.4	0.2	0	0	0	0.6	0	32.2	18	50.94	1	4
2	1	8	9	180	20	0.11	0.11	0.22	0	0.22	2.44	0	27.89	22.5	77.92	1	4
2	1	8	10	82	8.2	0.3	0	0	0	0.1	0.6	0	41.1	11.71	24.48	1	4
2	1	8	8	349	43.63	0.38	0.38	0.25	0.13	0	4.5	0.13	66	69.8	75.38	1	4
2	1	8	6	79	13.17	0	0	0	0	0.17	1.83	0	28.5	13.17	53.74	1	4
2	1	8	11	122	11.09	0.09	0.18	0	0	0	1.18	0	23	12.2	64.89	1	4
2	1	8	8	84	10.5	0.25	0.13	0	0	0.25	1.5	0.13	21.88	14	70	1	4
2	2	8	7	12	1.71	0.14	0	0	0	0.29	0.14	0	14.86	2	13.48	2	4
2	1	8	7	113	16.14	0	0	0.14	0	0	2.14	0	25.71	16.14	73.86	1	4
2	1	8	9	63	7	0.11	0	0	0	0.22	1	0	18.56	7.88	43.15	1	4
2	1	8	8	52	6.5	0.13	0	0	0	0.13	0.75	0	14.25	7.43	52.53	1	4
2	1	8	6	17	2.83	0.33	0	0	0	0.17	0.17	0	11.33	4.25	27.87	1	4
2	1	8	5	37	7.4	0.2	0	0	0	0.2	0.6	0	23	9.25	35.58	1	4
2	1	8	5	29	5.8	0.2	0	0	0	0	0.4	0	19.4	7.25	42.65	1	4
2	1	8	5	120	24	0.2	0.6	0	0	0	1.8	0	81	30	35.29	1	4
2	1	8	6	29	4.83	0	0	0	0	0.17	0.33	0	12	4.83	43.28	1	4
2	1	8	5	17	3.4	0.2	0	0	0	0.2	0.2	0	20.2	4.25	17.89	1	4
2	1	8	5	82	16.4	0.6	0.4	0	0	0.2	1.6	0.6	21.8	41	90.11	1	4
2	1	8	4	16	4	0	0	0	0	0.25	0.5	0	9.25	4	13.33	1	4
2	1	8	4	0	0	0	0	0	0	1	0	0	5.25	0	0	1	4
2	1	8	7	65	9.29	0.14	0.14	0	0	0.14	1	0	13.71	10.83	97.01	1	4
2	1	8	4	39	9.75	0	0.25	0	0	0.25	1.5	0	11.75	9.75	79.59	1	4
2	1	8	9	106	11.78	0.22	0.11	0	0	0	1.22	0	18.56	15.14	83.46	1	4
2	1	8	5	18	3.6	0.2	0	0	0	0	0.4	0	10.6	4.5	33.96	1	4
2	2	8	8	61	7.63	0.25	0	0	0	0.25	0.88	0	12.38	10.17	78.21	1	4
2	2	8	8	105	13.13	0.25	0.25	0	0	0.13	1.75	0.13	15.63	17.5	87.5	2	4
2	1	8	4	13	3.25	0	0	0	0	0.25	0.5	0	14	3.25	28.89	1	4
2	1	8	4	34	8.5	0.25	0	0	0	0	0	0	26.25	11.33	45.33	1	4
2	1	8	8	86	10.75	0.13	0.25	0	0	0.25	0.63	0.13	25.63	12.29	52.76	1	4
2	1	8	5	16	3.2	0	0	0	0	0.4	0.4	0	7	3.2	50	1	4
2	1	8	6	212	35.33	0.5	0.5	0.17	0	0.17	4.83	0	53	70.67	89.08	1	4
2	1	8	4	19	4.75	0.25	0	0	0	0	0	0	19.75	6.33	26.39	1	4
2	2	8	8	152	19	0.13	0.38	0	0	0.13	2	0	42	21.71	54.09	2	4
2	2	8	7	61	8.71	0	0	0	0	0.29	0.29	0	24.14	8.71	50	2	4
2	1	8	7	38	5.43	0.14	0	0	0	0.29	0.29	0	10	6.33	66.67	1	4
2	1	8	10	252	25.2	0.1	0.2	0.2	0	0.1	4.1	0	31.8	28	83.17	1	4
2	1	8	8	167	20.88	0.13	0.5	0	0	0	3	0	33	23.86	78.77	1	4
2	1	8	7	32	4.57	0	0	0	0	0.43	0.57	0	12.71	4.57	42.67	1	4
2	1	8	7	117	16.71	0.71	0.29	0	0	0.14	2.29	0	18.14	58.5	108.33	1	4
2	1	8	8	103	12.88	0.13	0.25	0	0	0	1.63	0	25	14.71	64.78	1	4
2	1	8	9	104	11.56	0.11	0.11	0	0	0	1.11	0	20.89	13	66.24	1	4
2	1	8	5	76	15.2	0.4	0.2	0	0	0	1.2	0	37.6	25.33	44.44	1	4
2	1	6	5	8	1.6	0	0	0	0	0.8	0.2	0	13.6	1.6	13.56	1	4
2	1	8	8	116	14.5	0.13	0.38	0	0	0.13	1.63	0	28.88	16.57	52.97	1	4
2	1	8	5	20	4	1	0	0	0	0	0.4	0	9.8	20	35.71	1	4
2	1	8	8	70	8.75	0.13	0	0	0	0	0.38	0	43.38	10	24.73	1	4
2	1	8	9	163	18.11	0.11	0.22	0.11	0	0.11	2.44	0	24.22	20.38	87.63	1	4
2	1	8	4	5	1.25	0	0	0	0	0.75	0.25	0	2.25	1.25	50	1	4
2	1	8	7	79	11.29	0.14	0	0	0	0	1.57	0	20.43	13.17	58.52	1	4
2	1	8	5	14	2.8	0.4	0	0	0	0.2	0.2	0	5.2	4.67	48.28	1	4
2	1	8	5	36	7.2	0	0	0	0	0.2	1.4	0	12.8	7.2	66.67	1	4
2	1	8	8	54	6.75	0	0.13	0	0	0.13	0.75	0	16.13	6.75	45.76	1	4
2	1	6	4	32	8	0	0	0	0	0	0.25	0	30.75	8	34.04	1	4
2	1	8	4	1	0.25	0	0	0	0	0.75	0	0	6	0.25	5.88	1	4
2	1	8	7	62	8.86	0.14	0	0	0	0.14	0.57	0	19.14	10.33	51.67	1	4
2	1	8	8	178	22.25	0.25	0.13	0.13	0	0	2.25	0	44	29.67	69.8	1	4
2	1	8	8	145	18.13	0	0.25	0	0	0	2.5	0	27.5	18.13	79.23	1	4
2	1	8	8	44	5.5	0	0	0	0	0.13	0.63	0	9	5.5	81.48	1	4
2	1	8	7	79	11.29	0.43	0	0	0	0	1	0	13.86	19.75	80.61	1	4
2	1	8	8	147	18.38	0	0.38	0	0	0.13	1.5	0	39	18.38	57.42	1	4
2	1	8	9	99	11	0.33	0.22	0	0	0.11	0.89	0	27.33	16.5	52.94	1	4
2	1	8	8	30	3.75	0	0	0	0	0.13	0.38	0	9.63	3.75	42.86	1	4
2	1	8	4	11	2.75	0.25	0	0	0	0.25	0.25	0	9.25	3.67	29.73	1	4
2	1	8	7	51	7.29	0	0	0	0	0.43	0.86	0	10.14	7.29	86.44	1	4
2	1	8	7	32	4.57	0.14	0	0	0	0.14	0.86	0	6.71	5.33	76.19	1	4
2	2	8	6	96	16	0	0.33	0	0	0	1.17	0	45.17	16	44.86	1	4
2	1	8	6	30	5	0.17	0	0	0	0.17	0.17	0	21.5	6	28.85	1	4
2	1	8	8	200	25	0	0	0.25	0	0.13	2	0	44.25	25	69.44	1	4
2	1	8	6	35	5.83	0.17	0	0	0	0.17	1	0	14.5	7	58.33	1	4
2	1	8	4	23	5.75	0.5	0	0	0	0.25	0	0	18.25	11.5	46	1	4
2	1	8	6	66	11	0.17	0.17	0	0	0	1.67	0	15.33	13.2	91.67	1	4
2	1	8	9	111	12.33	0.11	0.11	0	0	0.11	1.44	0	24.22	13.88	58.42	1	4
2	1	8	8	262	32.75	0.13	0.38	0.25	0	0.13	4.25	0	39.13	37.43	90.97	2	4
2	1	8	5	56	11.2	0	0.2	0	0	0	0.4	0	22.6	11.2	47.86	1	4
2	1	8	5	16	3.2	0	0	0	0	0.4	0.4	0	8.8	3.2	39.02	1	4
2	1	8	9	110	12.22	0.11	0.22	0	0	0.11	1.22	0	26	13.75	62.86	1	4
2	1	8	7	69	9.86	0.43	0.14	0	0	0.14	0.86	0.14	18.43	17.25	58.97	1	4
2	2	8	5	5	1	0.6	0	0	0	0.2	0	0	7	2.5	22.73	1	4
2	1	8	7	20	2.86	0.14	0	0	0	0.14	0.14	0	15.71	3.33	17.86	1	4
2	1	8	8	94	11.75	0.25	0.13	0	0	0	0.88	0	26.88	15.67	55.95	1	4
2	1	8	5	8	1.6	0	0	0	0	0.4	0.2	0	5.8	1.6	24.24	1	4
2	1	8	4	55	13.75	0	0.25	0	0	0	1.5	0	20.5	13.75	72.37	1	4
2	1	8	6	25	4.17	0	0	0	0	0.17	0.17	0	8.17	4.17	56.82	1	4
2	1	8	5	34	6.8	0.4	0	0	0	0	0.6	0	29	11.33	33.33	1	4
2	1	8	7	82	11.71	0.14	0	0.14	0	0.14	1.57	0	29	13.67	64.57	1	4
2	1	8	7	27	3.86	0.57	0	0	0	0.14	0.29	0	11	9	42.19	1	4
2	1	8	10	61	6.1	0.3	0.1	0	0	0.1	0.7	0	17.7	8.71	35.88	1	4
2	1	8	8	61	7.63	0.13	0.13	0	0	0.38	0.75	0	15.88	8.71	51.26	1	4
2	1	8	10	119	11.9	0.1	0.1	0	0	0	1.6	0	23.3	13.22	53.85	1	4
2	1	8	10	79	7.9	0	0	0	0	0.2	1	0	23.3	7.9	62.2	1	4
2	1	8	10	20	2	0.1	0	0	0	0.4	0.1	0	13.6	2.22	17.24	1	4
2	2	8	9	109	12.11	0	0.11	0.11	0	0.22	1.44	0	21.89	12.11	69.43	2	4
2	1	8	8	176	22	0.13	0.13	0.13	0	0	2.63	0.13	23.38	25.14	100	1	4
2	1	8	7	34	4.86	0.43	0	0	0	0.43	0.86	0	9.86	8.5	75.56	1	4
2	1	8	8	48	6	0.25	0	0	0	0	1	0	9.25	8	102.13	1	4
2	1	8	8	111	13.88	0	0.13	0	0	0	1.75	0	30.25	13.88	55.78	1	4
2	1	8	5	25	5	0.2	0	0	0	0	0.4	0	12.2	6.25	46.3	1	4
2	1	8	8	80	10	0.25	0.13	0	0	0	1.38	0.25	9.38	13.33	148.15	1	4
2	2	8	7	85	12.14	0.14	0.14	0	0	0.14	1	0	18.43	14.17	71.43	2	4
2	1	8	4	12	3	0	0	0	0	0.5	0.5	0	6.25	3	38.71	1	4
2	1	8	9	191	21.22	0.22	0.33	0.11	0	0.11	2.78	0	45.33	27.29	53.2	1	4
2	1	8	8	125	15.63	0.38	0.13	0.13	0	0.13	1.75	0	16	25	107.76	1	4
2	1	8	8	364	45.5	0.38	0.13	0.25	0.13	0.13	4.13	0.38	57.5	72.8	91.46	1	4
2	1	8	10	225	22.5	0.3	0.1	0	0.1	0.1	2.3	0	48.7	32.14	60.81	1	4
2	2	8	9	268	29.78	0	0.33	0.22	0	0.22	2.89	0.33	36.56	29.78	91.16	2	4
2	1	8	9	185	20.56	0.22	0.22	0.11	0	0	2.44	0	40.89	26.43	59.68	1	4
2	1	8	5	36	7.2	0.2	0	0	0	0	0.4	0	14.4	9	55.38	1	4
2	1	8	6	41	6.83	0.17	0	0	0	0.17	0.33	0	28.5	8.2	25.79	1	4
2	1	8	7	43	6.14	0.57	0	0	0	0.14	0.43	0	14.14	14.33	60.56	1	4
2	1	8	8	84	10.5	0.13	0	0	0	0	0.63	0	20.38	12	68.85	1	4
